# Supplementary material for: Sorafenib Analogue and Its Rearranged Compound: Design, Synthesis, Their In Vitro Anticancer Activity and Crystal Structure of the Rearranged Compound Dichloromethane Solvate
Source: Preprints.org preprint supplement (doi:10.20944/preprints202401.1715.v1), 2024-01-24

**Sorafenib analogue and its rearranged compound: design, synthesis, their in vitro anticancer activity and crystal structure of the rearranged compound dichloromethane solvate**

Qunying Yu

School of Pharmacy and Life Science, Jiujiang University, Jiujiang 332000, China

**Supporting Information**

**Table of Contents**

|                                                                                                   |    |
|---------------------------------------------------------------------------------------------------|----|
| General Information.....                                                                          | S2 |
| <sup>1</sup> H NMR spectrum (400 MHz) of compound <b>2</b> in DMSO- <i>d</i> <sub>6</sub> .....   | S2 |
| <sup>1</sup> H NMR spectrum (400 MHz) of compound <b>3</b> in CD <sub>3</sub> OD.....             | S3 |
| <sup>1</sup> H NMR spectrum (400 MHz) of compound <b>4</b> in CD <sub>3</sub> OD .....            | S3 |
| <sup>1</sup> H NMR spectrum (400 MHz) of compound <b>1A</b> in DMSO- <i>d</i> <sub>6</sub> .....  | S4 |
| <sup>13</sup> C NMR spectrum (400 MHz) of compound <b>1A</b> in DMSO- <i>d</i> <sub>6</sub> ..... | S4 |
| <sup>1</sup> H NMR spectrum (400 MHz) of compound <b>1A2</b> in DMSO- <i>d</i> <sub>6</sub> ..... | S5 |
| IR spectrum of <b>2</b> .....                                                                     | S6 |
| IR spectrum of <b>3</b> .....                                                                     | S6 |
| IR spectrum of <b>4</b> .....                                                                     | S7 |
| IR spectrum of <b>1A2</b> .....                                                                   | S7 |
| IR spectrum of <b>1A</b> .....                                                                    | S8 |
| ESI-MS spectrum of <b>1A</b> .....                                                                | S8 |
| ESI-MS spectrum of <b>1A2</b> .....                                                               | S9 |

## General Information

Room temperature was to be 20-25°C. All reagents obtained from commercial sources were used without further purification.  $^1\text{H}$  and  $^{13}\text{C}$  spectra were recorded on Bruker DRX-400 instrument with TMS as internal standard. Chemical shifts ( $\delta$  ppm) are calibrated against the deuterated solvent DMSO ( $\delta$  2.50 for  $^1\text{H}$  NMR and 39.52 for  $^{13}\text{C}$  NMR);  $\text{CDCl}_3$  ( $\delta$  7.26 for  $^1\text{H}$  NMR and 77.16 for  $^{13}\text{C}$  NMR). Flash column chromatography was performed with various combinations of dichloromethane and methanol as eluent. ESI-MS analysis was determined on API QSTAR Pulsari spectrometer. Infrared spectra were recorded on a FT-IR spectrometer with KBr pellets. Yields refer to purified, dried and spectroscopically ( $^1\text{H}$  NMR) homogeneous material. Multiplicities are reported as the following abbreviations: s = singlet, d = doublet, t = triplet, q = quartet, m = multiplet, br = broad.

### $^1\text{H}$ NMR spectrum (400 MHz) of compound 2 in $\text{DMSO}-d_6$

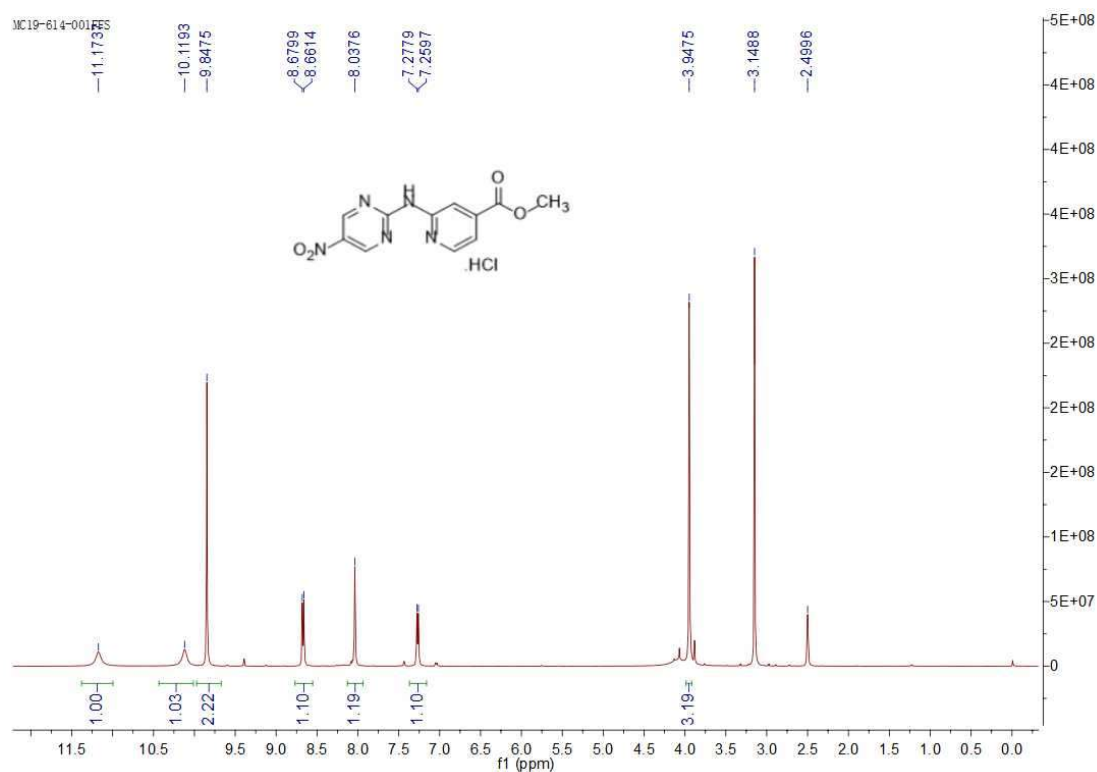

**<sup>1</sup>H NMR spectrum (400 MHz) of compound 3 in CD<sub>3</sub>OD**

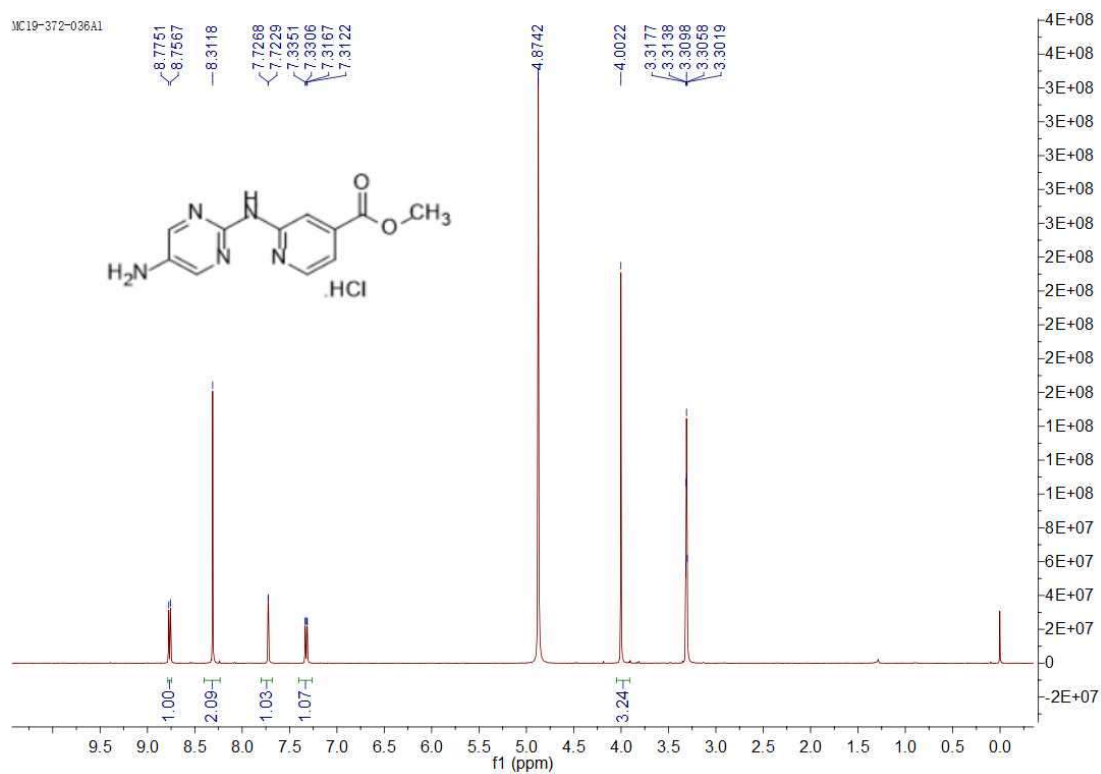

**<sup>1</sup>H NMR spectrum (400 MHz) of compound 4 in CD<sub>3</sub>OD**

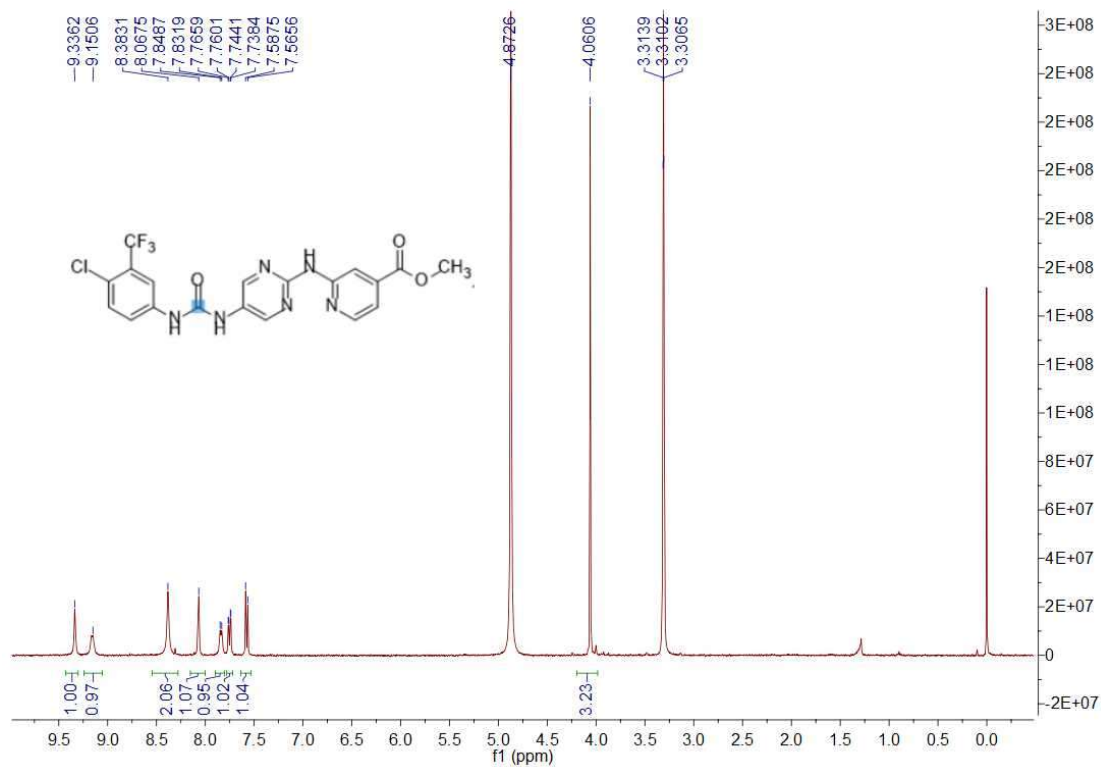

<sup>1</sup>H NMR spectrum (400 MHz) of compound 1A in DMSO-*d*<sub>6</sub>

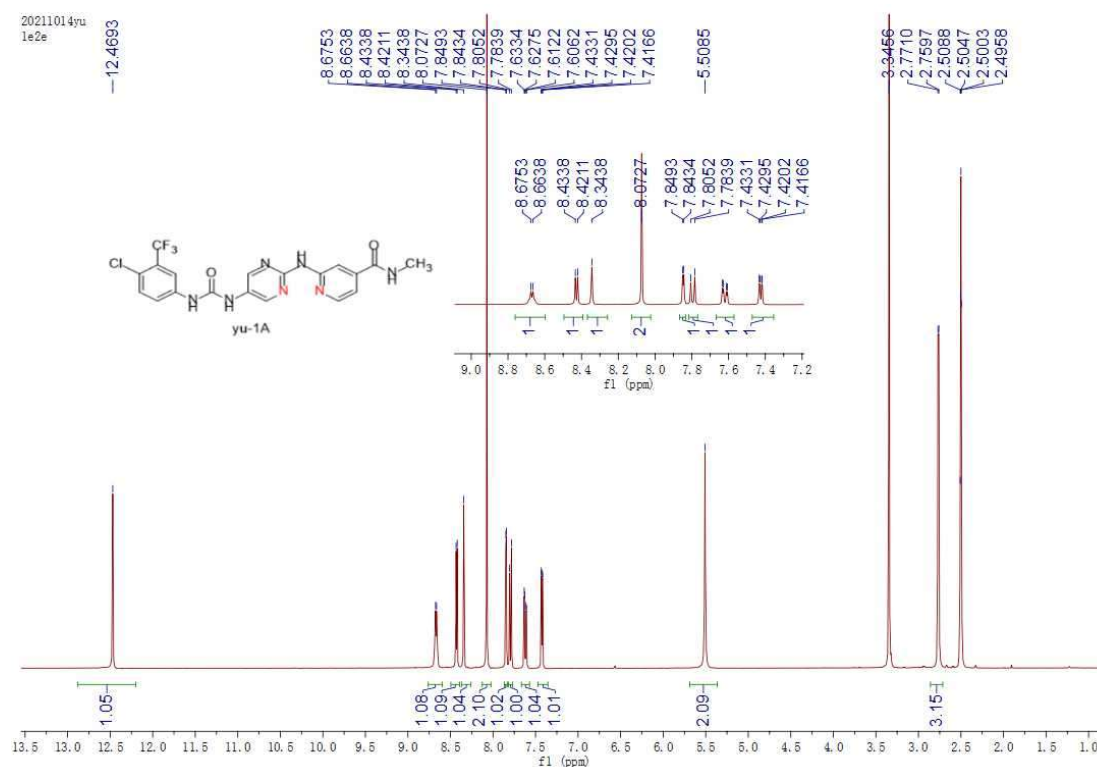

<sup>13</sup>C NMR spectrum (400 MHz) of compound 1A in DMSO-*d*<sub>6</sub>

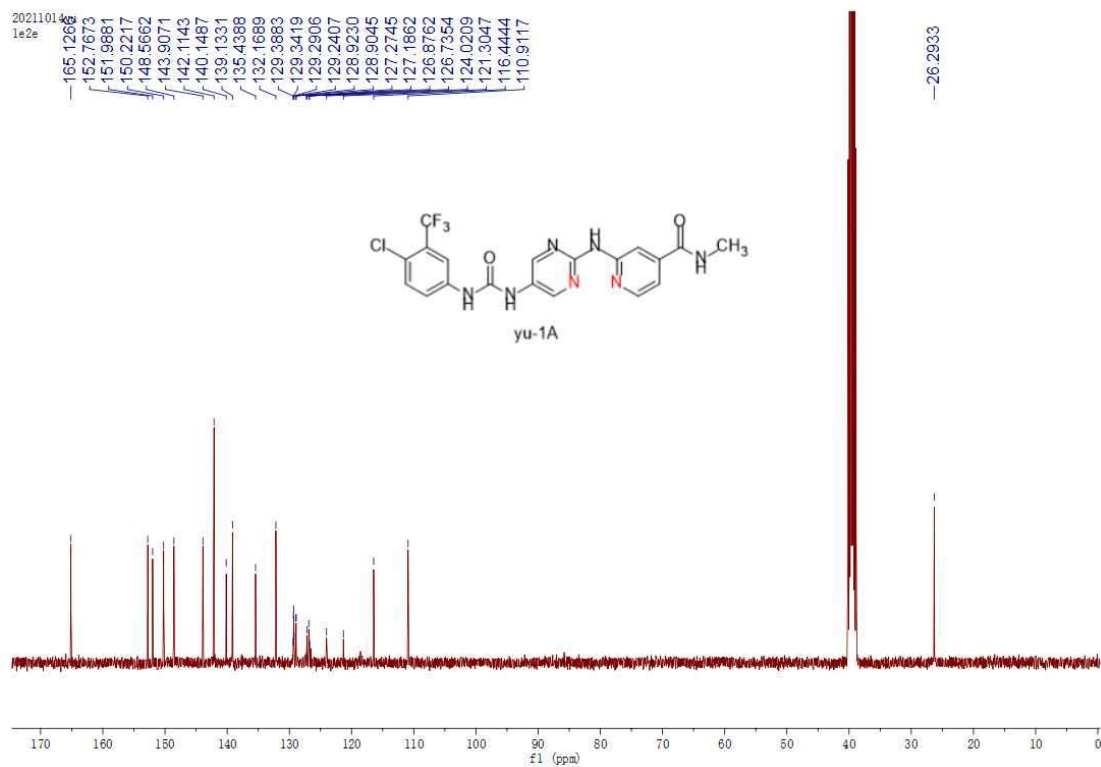

**<sup>1</sup>H NMR spectrum (400 MHz) of compound 1A2 in DMSO-*d*<sub>6</sub>**

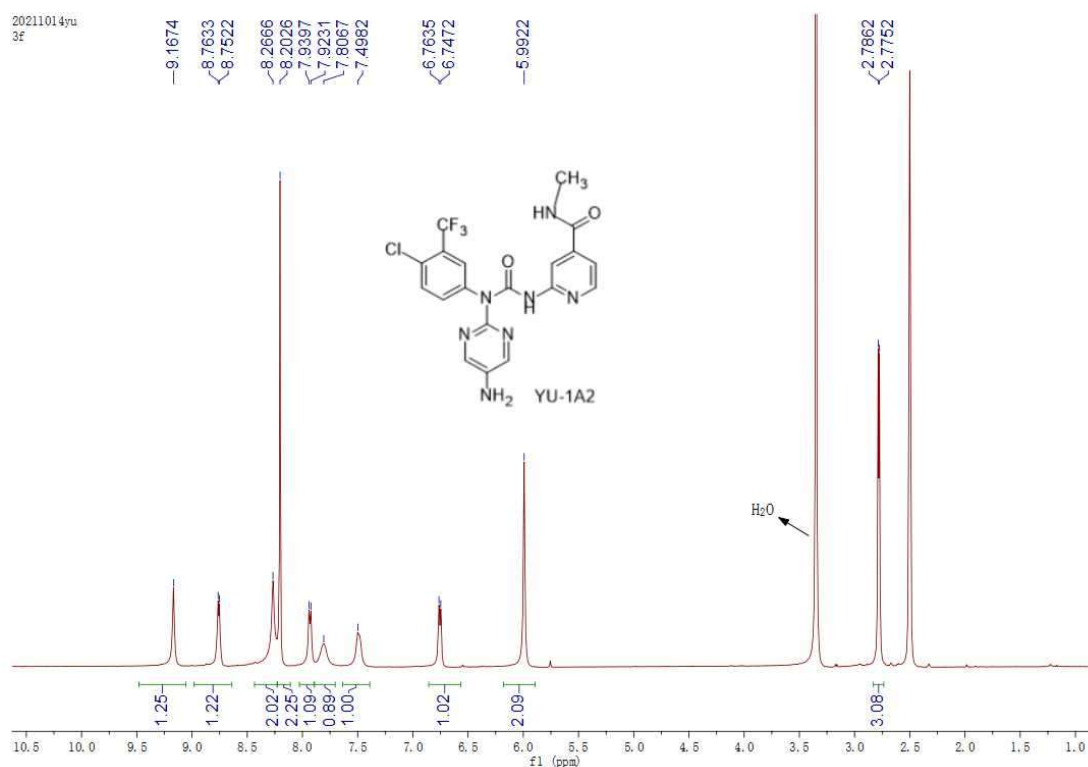

**<sup>13</sup>C NMR spectrum (400 MHz) of compound 1A2 in DMSO-*d*<sub>6</sub>**

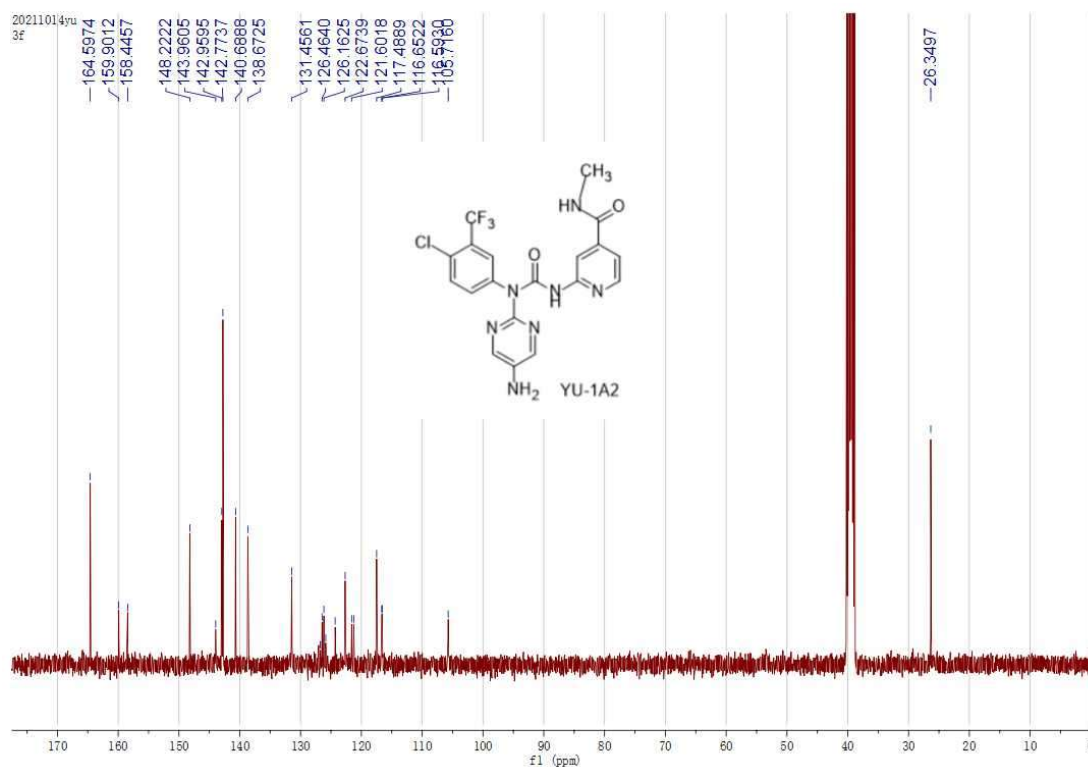

IR spectrum of 2

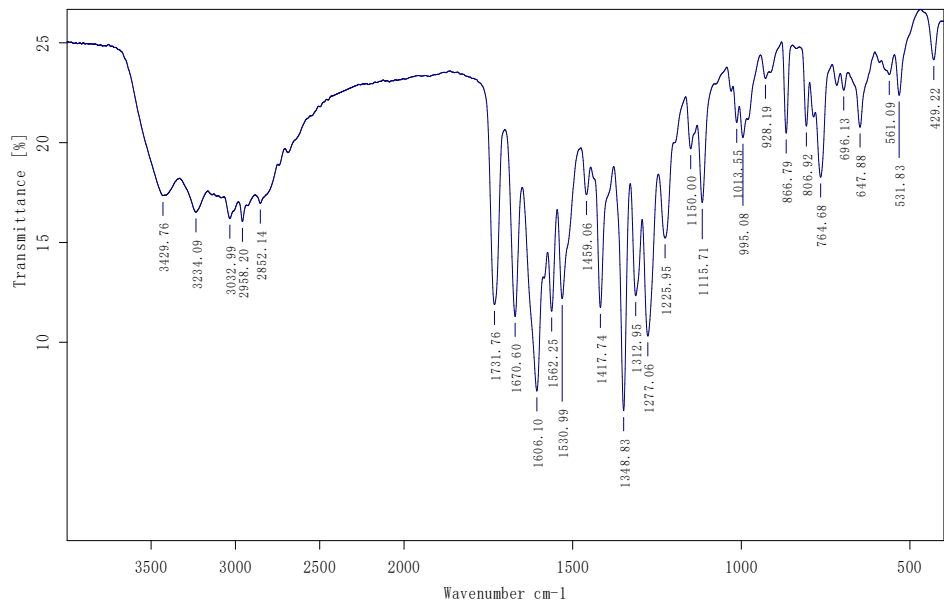

|                                           |      |      |           |
|-------------------------------------------|------|------|-----------|
| F:\20200630-化环-余群英-红外\20200630-yu-2-压片法.1 | 黄色粉末 | 黄色粉末 | 2020/6/30 |
|-------------------------------------------|------|------|-----------|

IR spectrum of 3

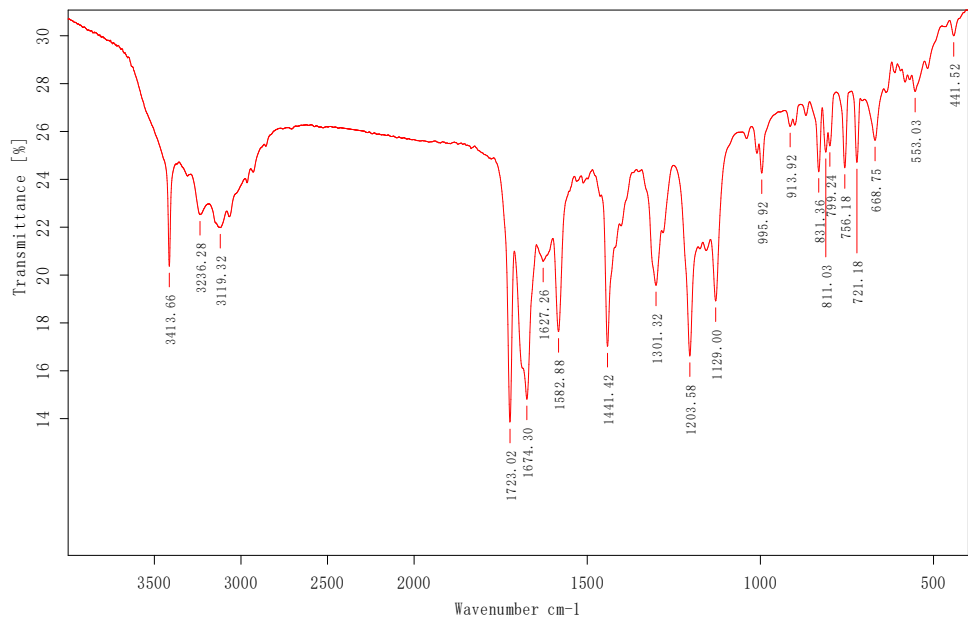

|                                           |      |      |           |
|-------------------------------------------|------|------|-----------|
| F:\20200630-化环-余群英-红外\20200630-yu-3-压片法.3 | 黄色粉末 | 黄色粉末 | 2020/6/30 |
|-------------------------------------------|------|------|-----------|

# IR spectrum of 4

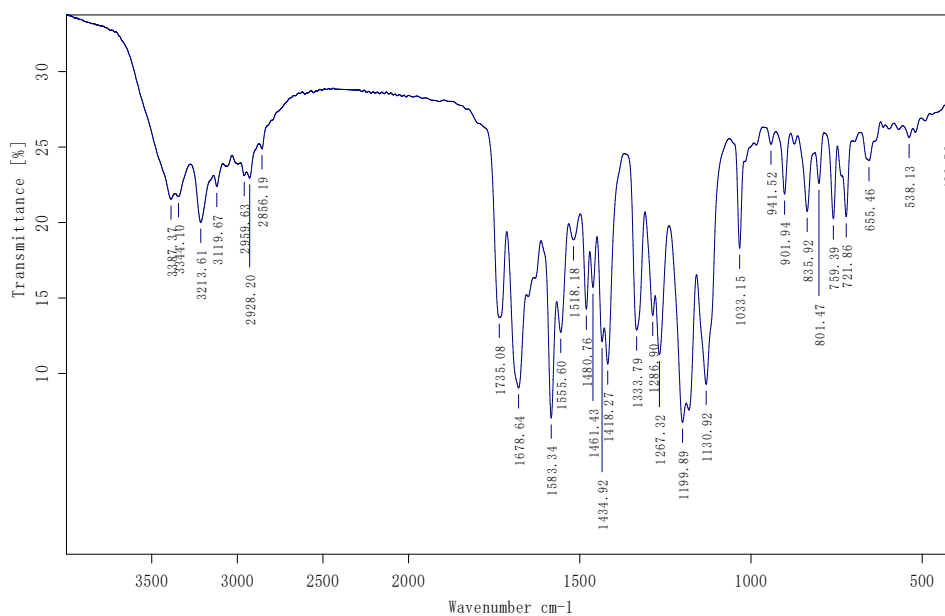

F:\20200630-化环-余群英-红外\20200630-yu-4-压片法.0

黄色粉末

黄色粉末

2020/6/30

Page 1 of 1

# IR spectrum of 1A2

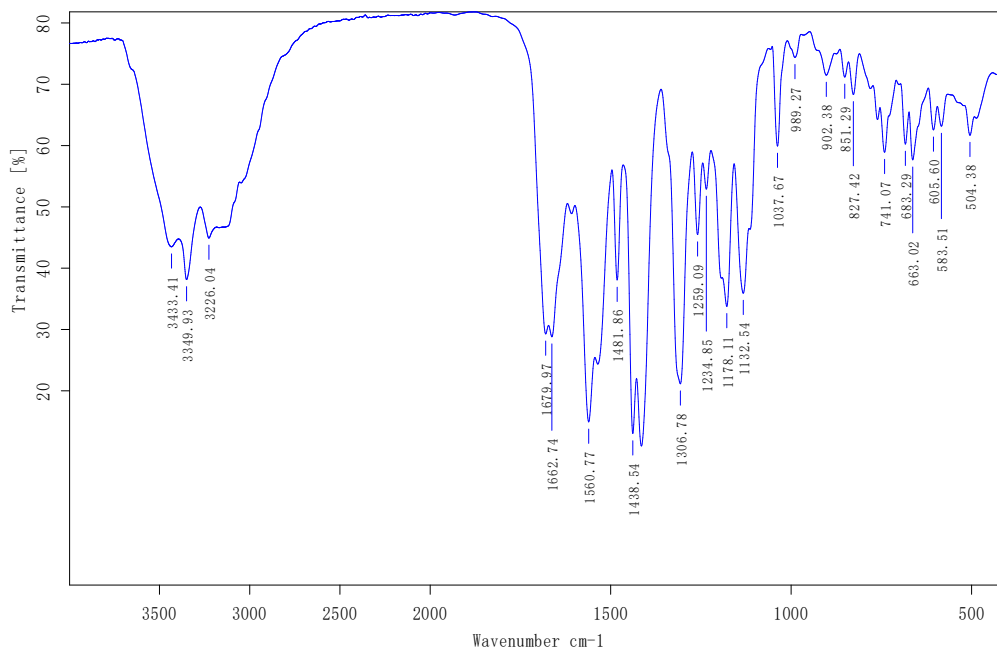

F:\20210621-药生-余群英-红外\20210621-yu-1A2-压片法.0

白色粉末

白色粉末

2021/6/21

Page 1 of 1

# IR spectrum of 1A

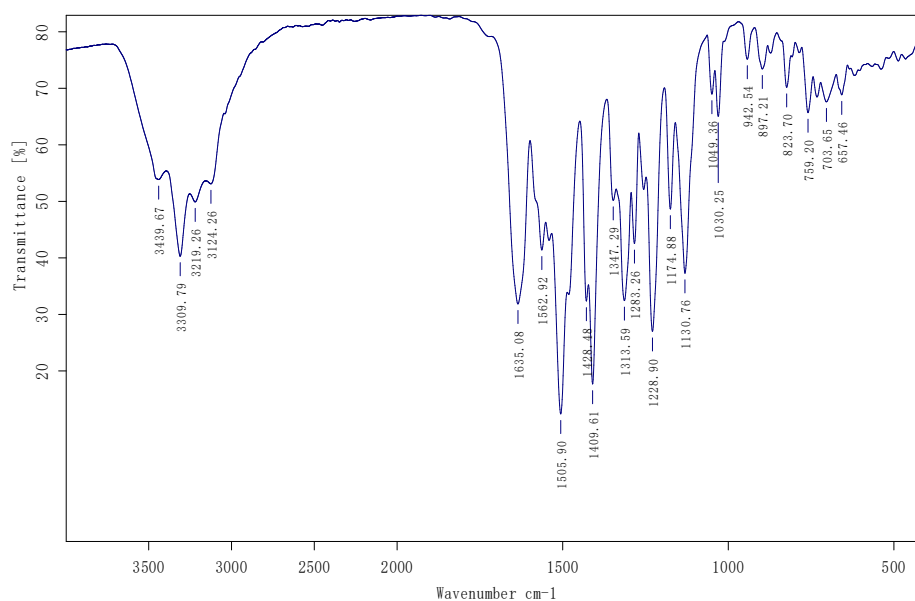

F:\20210621-药生-余群英-红外\20210621-1A-压片法.1

白色粉末

白色粉末

2021/6/21

Page 1 of 1

# ESI-MS spectrum of 1A

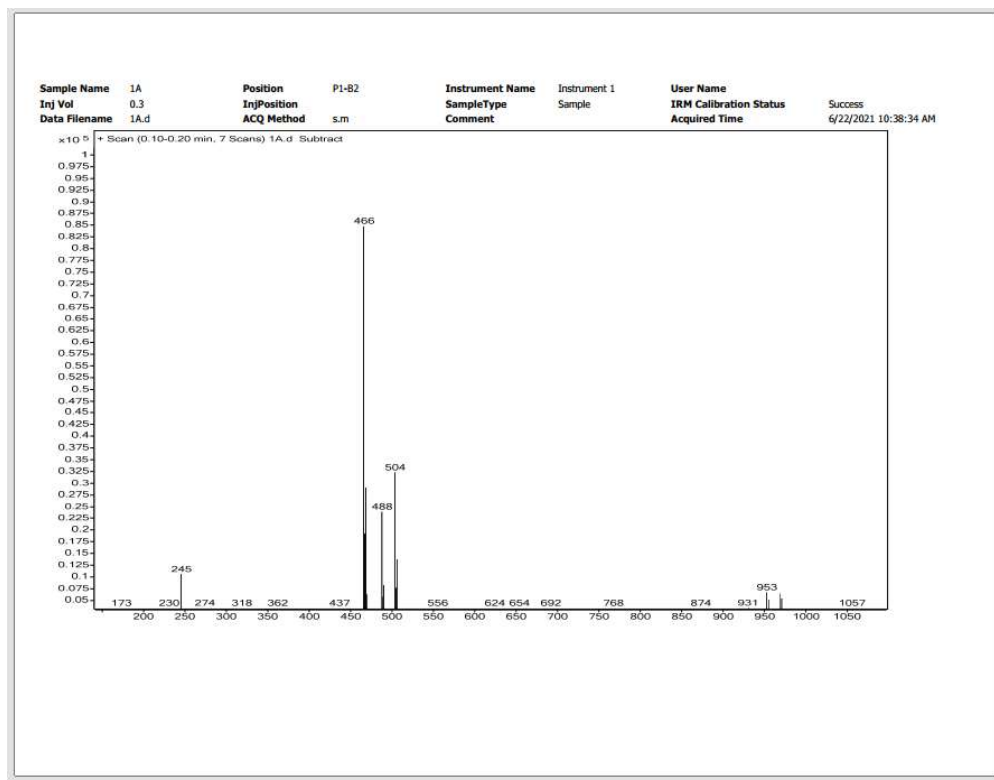



## ESI-MS spectrum of 1A2

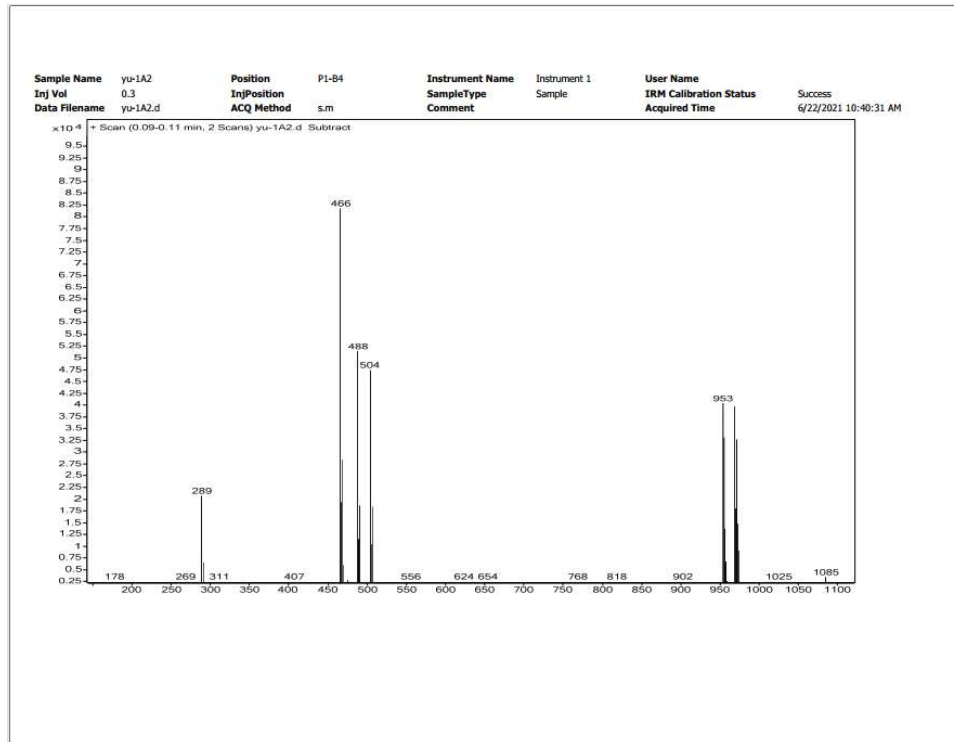

Supplement: Supplementary file 1 [file molecules-2847132-supplementary.pdf › supplementary materials/molecules-2847132-supplementary.pdf]
