# Supplementary material for: Sorafenib Analogue and Its Rearranged Compound: Design, Synthesis, Their In Vitro Anticancer Activity and Crystal Structure of the Rearranged Compound Dichloromethane Solvate
Source: Preprints.org preprint supplement (doi:10.20944/preprints202401.1715.v1), 2024-01-24
Supplement: Supplementary file 2 [file molecules-2847132-supplementary(1).pdf › supplementary materials/single crystal/molecules-2847132-supplementary(1).pdf]

Crystal data for yqy2:  $\text{C}_{19}\text{H}_{15}\text{ClF}_3\text{N}_7\text{O}_2 \cdot \text{CH}_2\text{Cl}_2$ ,  $M = 550.76$ ,  $a = 9.8517(7) \text{ \AA}$ ,  $b = 10.2973(7) \text{ \AA}$ ,  $c = 11.4712(8) \text{ \AA}$ ,  $\alpha = 86.802(3)^\circ$ ,  $\beta = 81.486(3)^\circ$ ,  $\gamma = 84.921(3)^\circ$ ,  $V = 1145.29(14) \text{ \AA}^3$ ,  $T = 100.(2) \text{ K}$ , space group  $P-1$ ,  $Z = 2$ ,  $\mu(\text{Cu K}\alpha) = 4.164 \text{ mm}^{-1}$ , 18242 reflections measured, 4496 independent reflections ( $R_{\text{int}} = 0.0875$ ). The final  $R_I$  values were 0.0932 ( $I > 2\sigma(I)$ ). The final  $wR(F^2)$  values were 0.2667 ( $I > 2\sigma(I)$ ). The final  $R_I$  values were 0.1097 (all data). The final  $wR(F^2)$  values were 0.2854 (all data). The goodness of fit on  $F^2$  was 1.085.

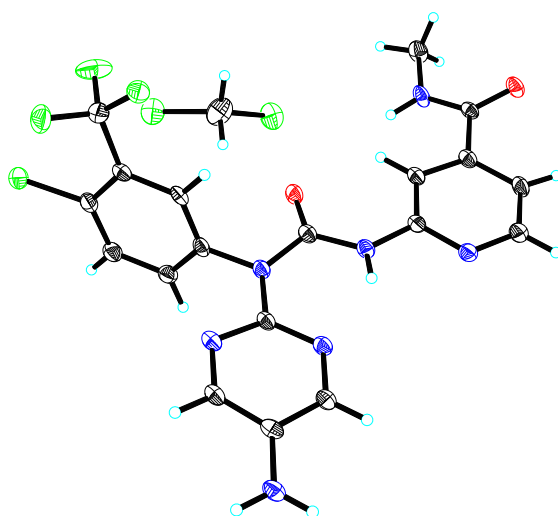

View of the molecules in an asymmetric unit.

Displacement ellipsoids are drawn at the 30% probability level.

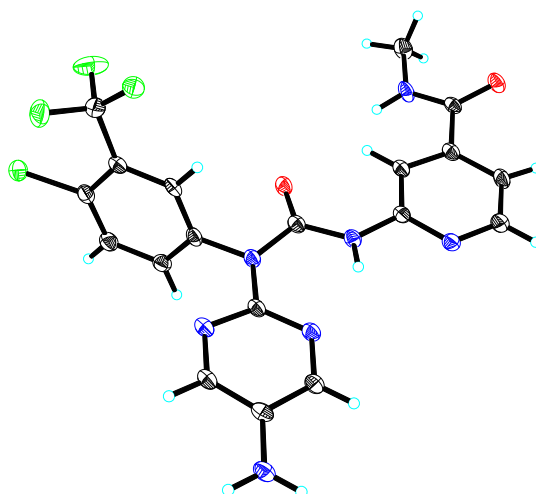

View of a molecule of yqy2 with the atom-labelling scheme.

Displacement ellipsoids are drawn at the 30% probability level.

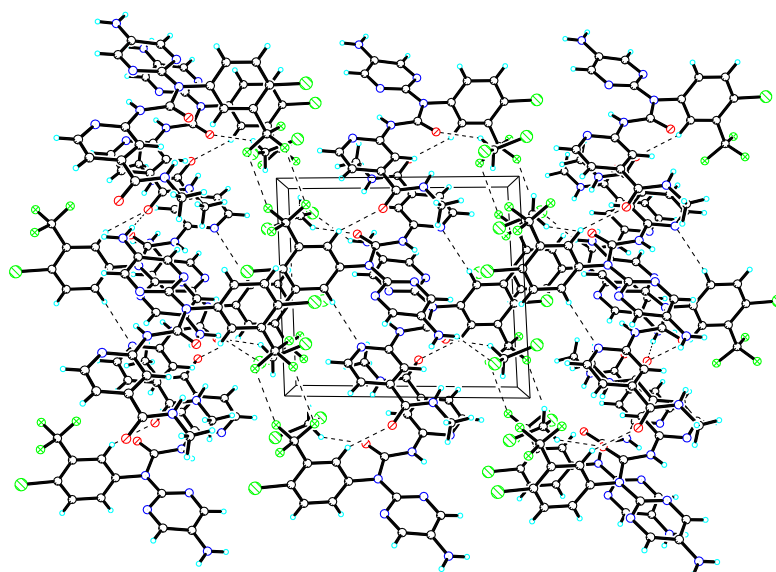

View of the pack drawing of yqy2.

Hydrogen-bonds are shown as dashed lines.

Table 1. Crystal data and structure refinement for yqy2\_0m.

|                      |                                                                                              |     |
|----------------------|----------------------------------------------------------------------------------------------|-----|
| Identification code  | global                                                                                       |     |
| Empirical formula    | C <sub>20</sub> H <sub>17</sub> Cl <sub>3</sub> F <sub>3</sub> N <sub>7</sub> O <sub>2</sub> |     |
| Formula weight       | 550.76                                                                                       |     |
| Temperature          | 100(2) K                                                                                     |     |
| Wavelength           | 1.54178 Å                                                                                    |     |
| Crystal system       | Triclinic                                                                                    |     |
| Space group          | P-1                                                                                          |     |
| Unit cell dimensions | a = 9.8517(7) Å                                                                              | α = |
| 86.802(3)°.          | b = 10.2973(7) Å                                                                             | β = |
| 81.486(3)°.          | c = 11.4712(8) Å                                                                             | γ = |
| 84.921(3)°.          |                                                                                              |     |
| Volume               | 1145.29(14) Å <sup>3</sup>                                                                   |     |
| Z                    | 2                                                                                            |     |
| Density (calculated) | 1.597 Mg/m <sup>3</sup>                                                                      |     |

|                                   |                                             |
|-----------------------------------|---------------------------------------------|
| Absorption coefficient            | 4.164 mm <sup>-1</sup>                      |
| F(000)                            | 560                                         |
| Crystal size                      | 0.340 x 0.270 x 0.080 mm <sup>3</sup>       |
| Theta range for data collection   | 3.90 to 72.42°.                             |
| Index ranges                      | -12<=h<=10, -12<=k<=12, -14<=l<=14          |
| Reflections collected             | 18242                                       |
| Independent reflections           | 4496 [R(int) = 0.0875]                      |
| Completeness to theta = 72.42°    | 98.8 %                                      |
| Absorption correction             | Semi-empirical from equivalents             |
| Max. and min. transmission        | 0.73 and 0.29                               |
| Refinement method                 | Full-matrix least-squares on F <sup>2</sup> |
| Data / restraints / parameters    | 4496 / 0 / 317                              |
| Goodness-of-fit on F <sup>2</sup> | 1.085                                       |
| Final R indices [I>2sigma(I)]     | R1 = 0.0932, wR2 = 0.2667                   |
| R indices (all data)              | R1 = 0.1097, wR2 = 0.2854                   |
| Largest diff. peak and hole       | 0.773 and -1.183 e.Å <sup>-3</sup>          |
